# Supplementary material for: A nucleotide–copper(ii) complex possessing a monooxygenase-like catalytic function
Source: Royal Society of Chemistry journal article supplement (doi:10.1039/d3tb00780d), 2023-01-01

Supplementary Materials for:

## A Nucleotide-Copper (II) Complex Possessing Monooxygenase-Like Catalytic Function

*Haifeng Wu,<sup>1</sup> Shichao Xu,<sup>1</sup> Peidong Du,<sup>1</sup> Yuanxi Liu,<sup>1</sup> Hui Li,<sup>2\*</sup> Haijun Yang,<sup>3</sup> Ting Wang,<sup>4</sup>  
Zhen-Gang Wang<sup>1\*</sup>*

<sup>1</sup>State Key Laboratory of Organic-Inorganic Composites, Key Lab of Biomedical Materials of Natural Macromolecules (Beijing University of Chemical Technology, Ministry of Education), Beijing Laboratory of Biomedical Materials, Beijing University of Chemical Technology, Beijing 100029, China.

<sup>2</sup>Beijing Advanced Innovation Center for Soft Matter Science and Engineering, Beijing University of Chemistry Technology, Beijing 100029, PR China.

<sup>3</sup>Department of Chemistry, Tsinghua University, Beijing 100084, China.

<sup>4</sup>CAS Key Laboratory for Biomedical Effects of Nanomaterials and Nanosafety, National Center for Nanoscience and Technology, Beijing 100190, China.

### Corresponding Authors

\*Address correspondence to: [hli@mail.buct.edu.cn](mailto:hli@mail.buct.edu.cn), [wangzg@mail.buct.edu.cn](mailto:wangzg@mail.buct.edu.cn)

**Table 1. Materials and reagents**

| Materials                   | Abbreviation                         | CAS         | Company  |
|-----------------------------|--------------------------------------|-------------|----------|
| Adenosine monophosphate     | AMP                                  | 4578-31-8   |          |
| Cytidine monophosphate      | CMP                                  | 6757-06-8   |          |
| Guanosine monophosphate     | GMP                                  | 5550-12-9   |          |
| Uridine monophosphate       | UMP                                  | 2287-36-8   |          |
| Adenosine                   | ---                                  | 58-61-7     |          |
| Cytidine                    | ---                                  | 65-46-3     |          |
| Guanosine                   | ---                                  | 118-00-3    |          |
| Uridine                     | ---                                  | 58-96-8     |          |
| Adenosine diphosphate       | ADP                                  | 16178-48-6  |          |
| Cytidine diphosphate        | CDP                                  | 34393-59-4  |          |
| Guanosine diphosphate       | GDP                                  | 7415-69-2   |          |
| Uridine diphosphate         | UDP                                  | 21931-53-3  | Aladdin  |
| Adenosine triphosphate      | ATP                                  | 987-65-5    |          |
| Cytidine triphosphate       | CTP                                  | 36051-68-0  |          |
| Guanosine triphosphate      | GTP                                  | 56001-37-7  |          |
| Uridine triphosphate        | UTP                                  | 108321-53-5 |          |
| Tyramine hydrochloride      | ---                                  | 60-19-5     |          |
| L-Tyrosine hydrochloride    | ---                                  | 16870-43-2  |          |
| Pyrene                      | ---                                  | 129-00-0    |          |
| Copper sulfate pentahydrate | CuSO <sub>4</sub> ·5H <sub>2</sub> O | 7758-99-8   |          |
| Hydrogen peroxide           | H <sub>2</sub> O <sub>2</sub>        | 7722-84-1   |          |
| Tyrosinase from mushroom    | Tyrosinase                           | 9002-10-2   |          |
| AAAAAAAAAAAAAAAAAAAAA       | poly A20                             | ---         | Hippobio |

CCCCCCCCCCCCCCCCCCCC poly C20 ---

GGGGGGGGGGGGGGGGGGGG poly G20 ---

TTTTTTTTTTTTTTTTTTTT poly T20 ---

---

Water was deionized using a Milli-Q system ( $\geq 18.25 \text{ M}\Omega \cdot \text{cm}^{-1}$ ).

**Figure S1** UV-vis spectra of tyramine oxidation reaction catalysed by  $\text{Cu}^{2+}$  and nucleotides.

$[\text{Cu}^{2+}] = 0.1 \text{ mM}$ ,  $[\text{nucleotides}] = 10 \text{ mM}$ ,  $[\text{tyramine}] = 1 \text{ mM}$ ,  $[\text{H}_2\text{O}_2] = 5 \text{ mM}$ , in water (pH=8.0).

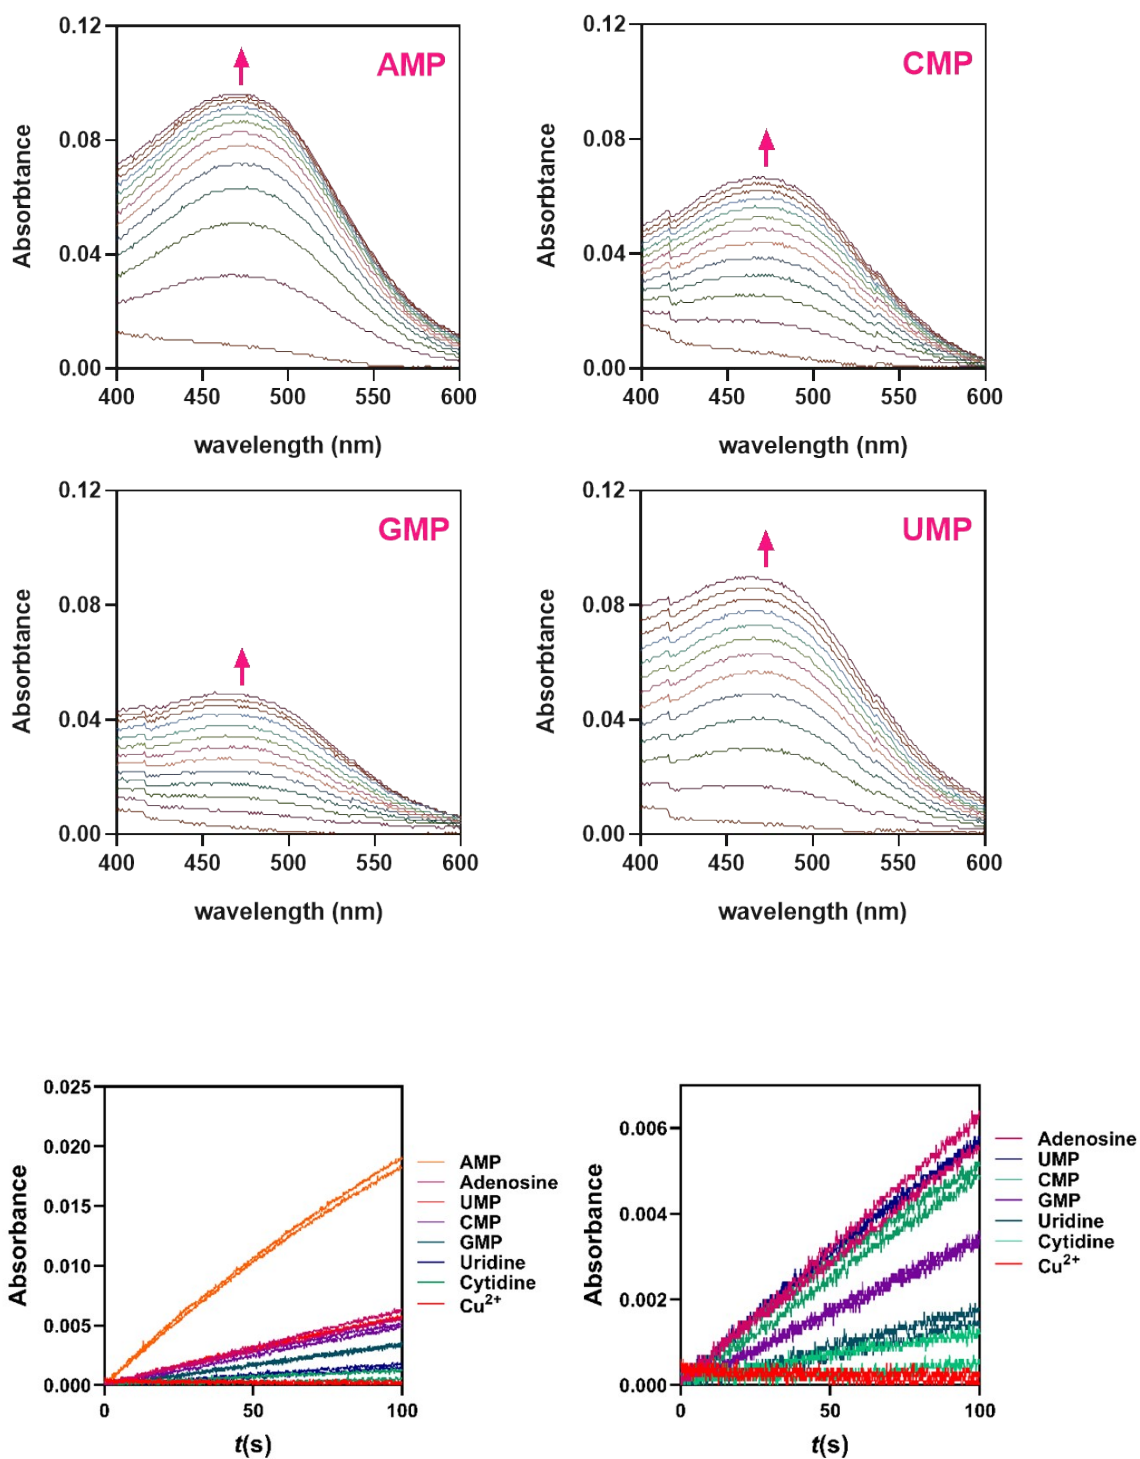



**Figure S2** Structure of nucleoside monophosphate.

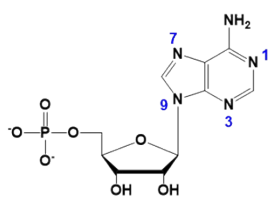

*Adenosine monophosphate*

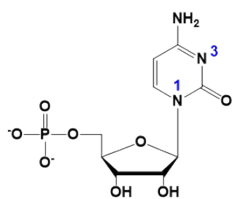

*Cytidine monophosphate*

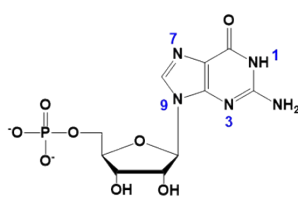

*Guanosine monophosphate*

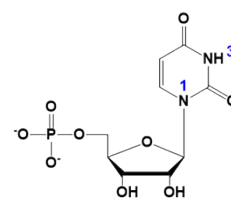

*Uridine monophosphate*

**Figure S3** Ligands' concentration effect on velocity of tyramine's oxidation reaction catalysed by  $\text{Cu}^{2+}$  and A/C/G/UMP.  $\text{Cu}^{2+}$  (0.1 mM),  $\text{H}_2\text{O}_2$  (5mM), tyramine (1mM). The data are presented as the mean  $\pm$  s.d., with the error bars representing the s.d. and N= 3.

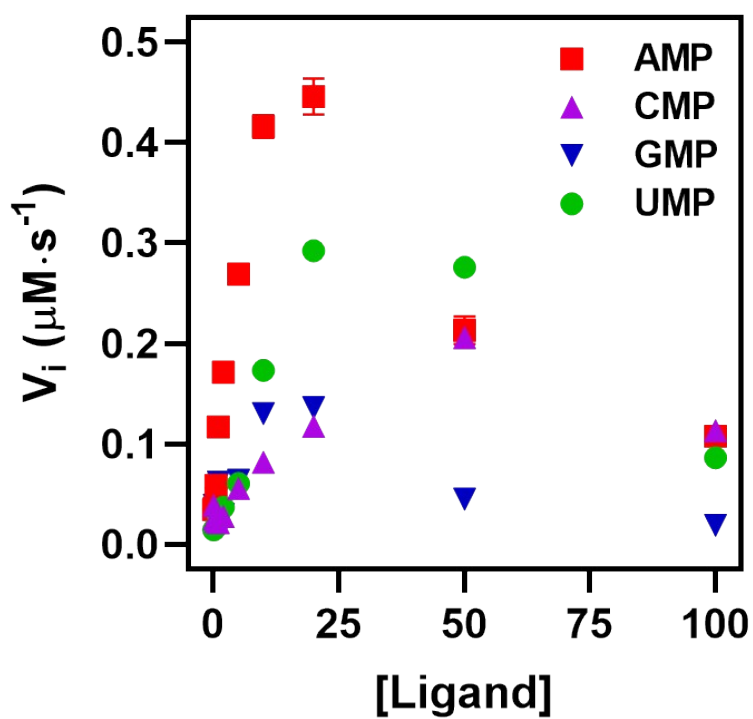

**Figure S4** KCl effect on tyramine's oxidation reaction catalysed by  $\text{Cu}^{2+}$  and AMP. AMP (20 mM),  $\text{Cu}^{2+}$  (50  $\mu\text{M}$ ),  $\text{H}_2\text{O}_2$  (5 mM), tyramine (1 mM). The data are presented as the mean  $\pm$  s.d., with the error bars representing the s.d. and  $N=3$ .

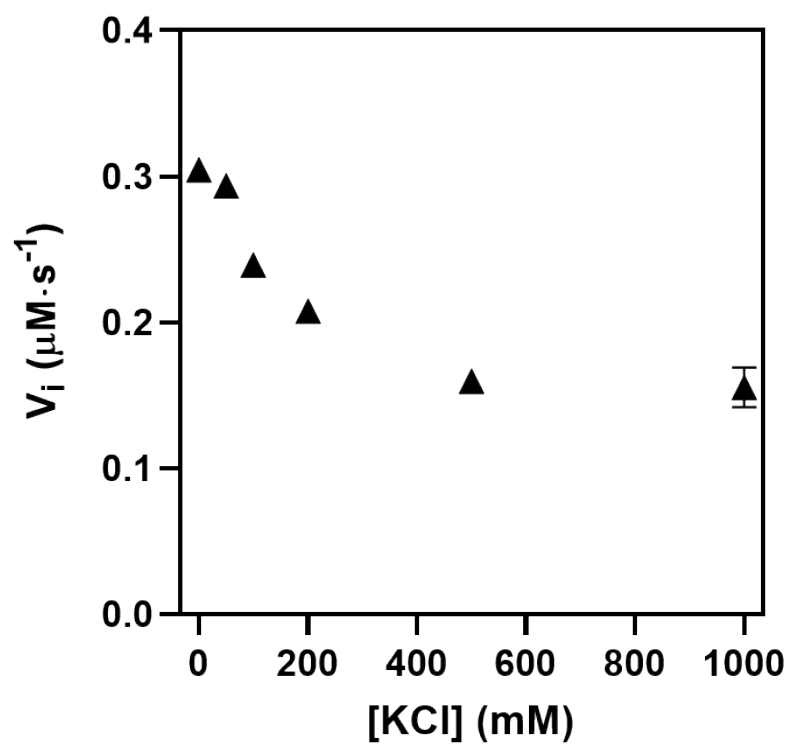



**Figure S5** 6 K CW-EPR of  $\text{Cu}^{2+}$ /AMP and  $\text{Cu}^{2+}$ /AMP/ $\text{H}_2\text{O}_2$ /tyramine.  $\text{CuSO}_4$  ( $500 \mu\text{M}$ ), AMP ( $10 \text{ mM}$ ),  $\text{H}_2\text{O}_2$  ( $1 \text{ mM}$ ), tyramine ( $1 \text{ mM}$ ),  $\text{mwFreq}$  ( $9.74\text{GHz}$ ).

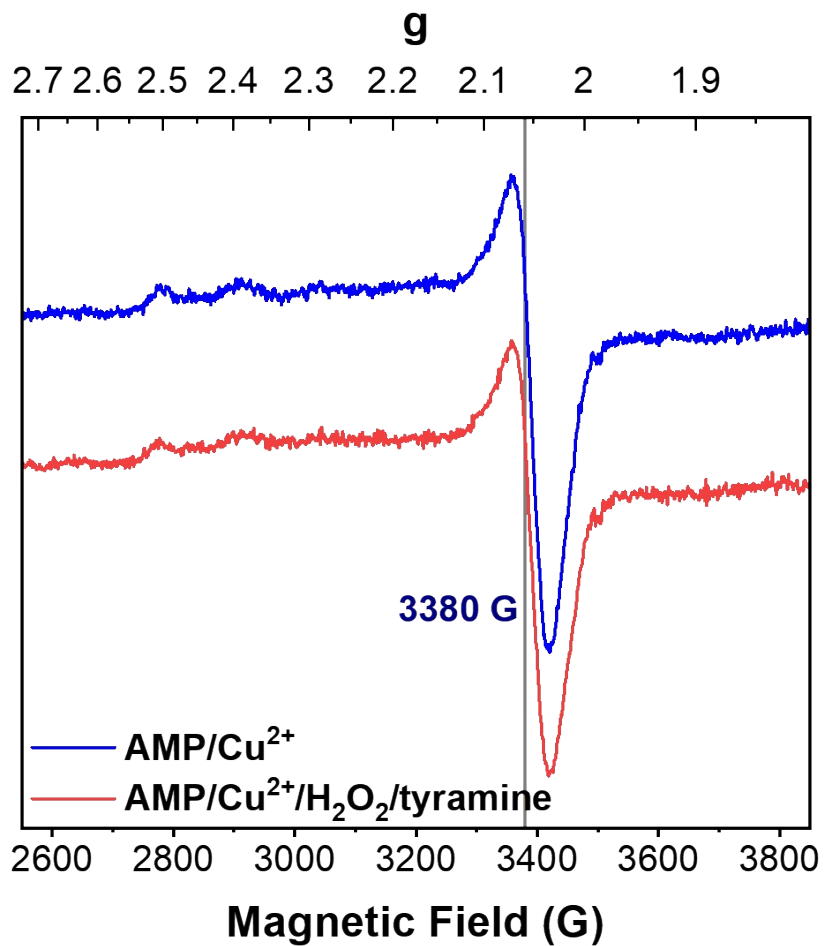

**Figure S6** (A) Methanol concentration effect on the catalytic tyramine oxidation reaction. (B) EPR measurement of the system of  $\text{Cu}^{2+}/\text{CMP}/\text{H}_2\text{O}_2$ . 60% MeOH, 100 mM DMPO, 20 mM CMP, 100  $\mu\text{M}$   $\text{Cu}^{2+}$ , 100  $\mu\text{M}$   $\text{H}_2\text{O}_2$ . The data are presented as the mean  $\pm$  s.d., with the error bars representing the s.d. and  $N=3$ .

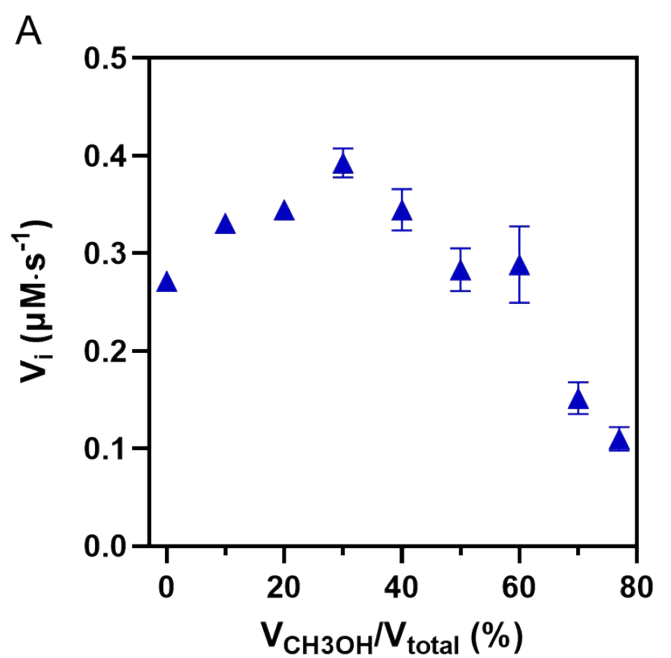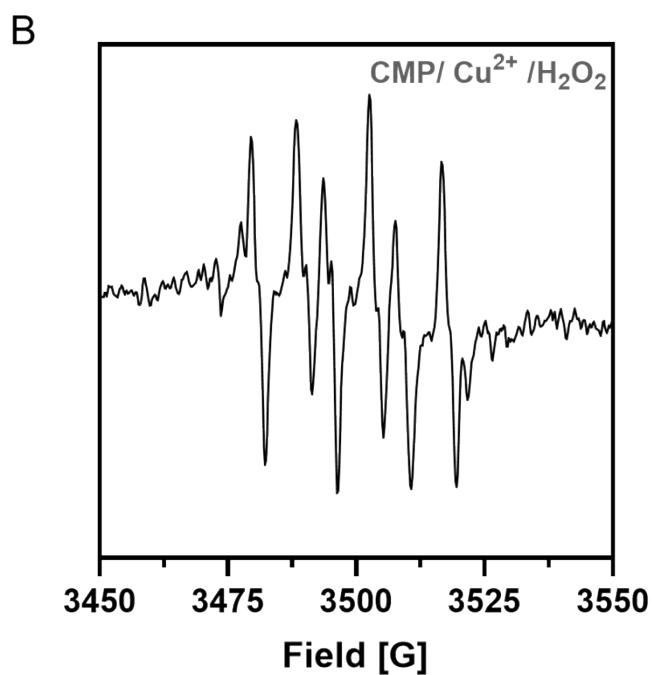

**Figure S7** EPR measurement of the system of  $\text{Cu}^{2+}$ / GMP/  $\text{H}_2\text{O}_2$ . 60% MeOH, 100 mM DMPO, 20 mM GMP, 100  $\mu\text{M}$   $\text{Cu}^{2+}$ , 100  $\mu\text{M}$   $\text{H}_2\text{O}_2$ .

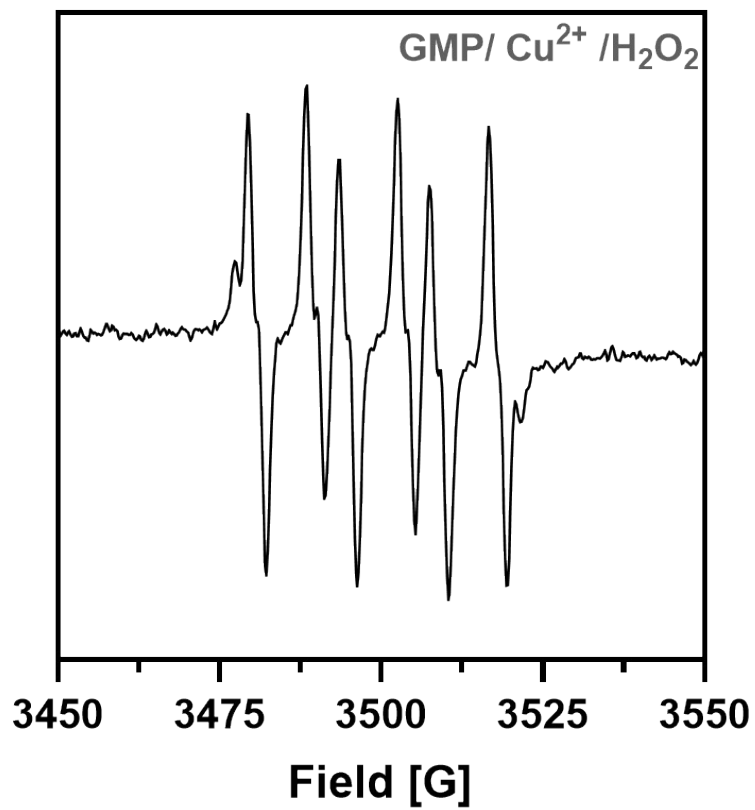

**Figure S8** EPR measurement of the system of  $\text{Cu}^{2+}$ / UMP/  $\text{H}_2\text{O}_2$ . 60% MeOH, 100 mM DMPO, 20 mM UMP, 100  $\mu\text{M}$   $\text{Cu}^{2+}$ , 100  $\mu\text{M}$   $\text{H}_2\text{O}_2$ .

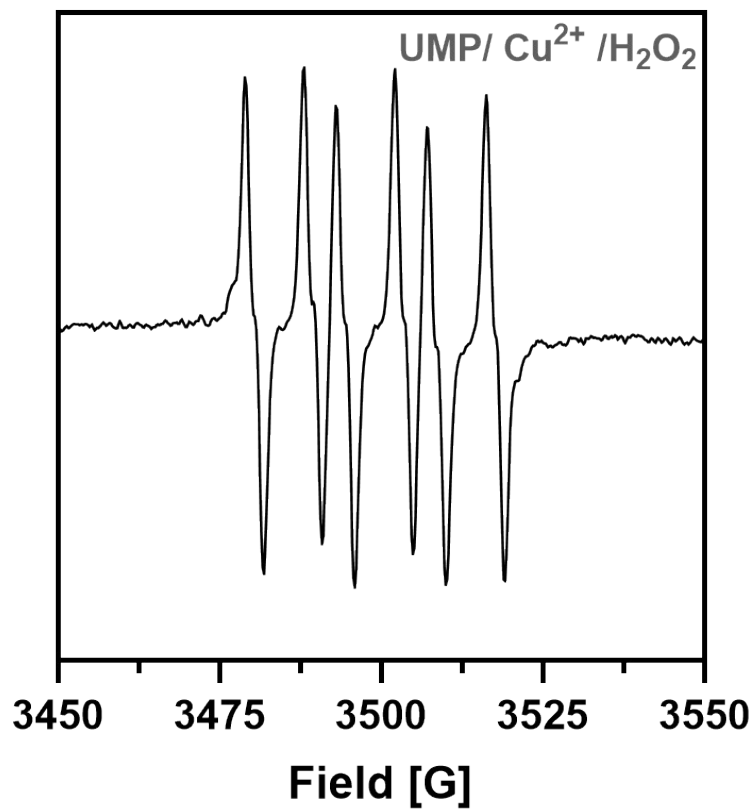

**Figure S9** Free radical quencher effect on tyramine's oxidation reaction catalysed by  $\text{Cu}^{2+}$ /AMP.  $\text{Cu}^{2+}$  (0.1mM), AMP (20 mM),  $\text{H}_2\text{O}_2$  (5 mM), tyramine (1 mM). TBA stands for tert-butanol, while SOD stands for superoxidase dismutase. The data are presented as the mean  $\pm$  s.d., with the error bars representing the s.d. and  $N=3$ .

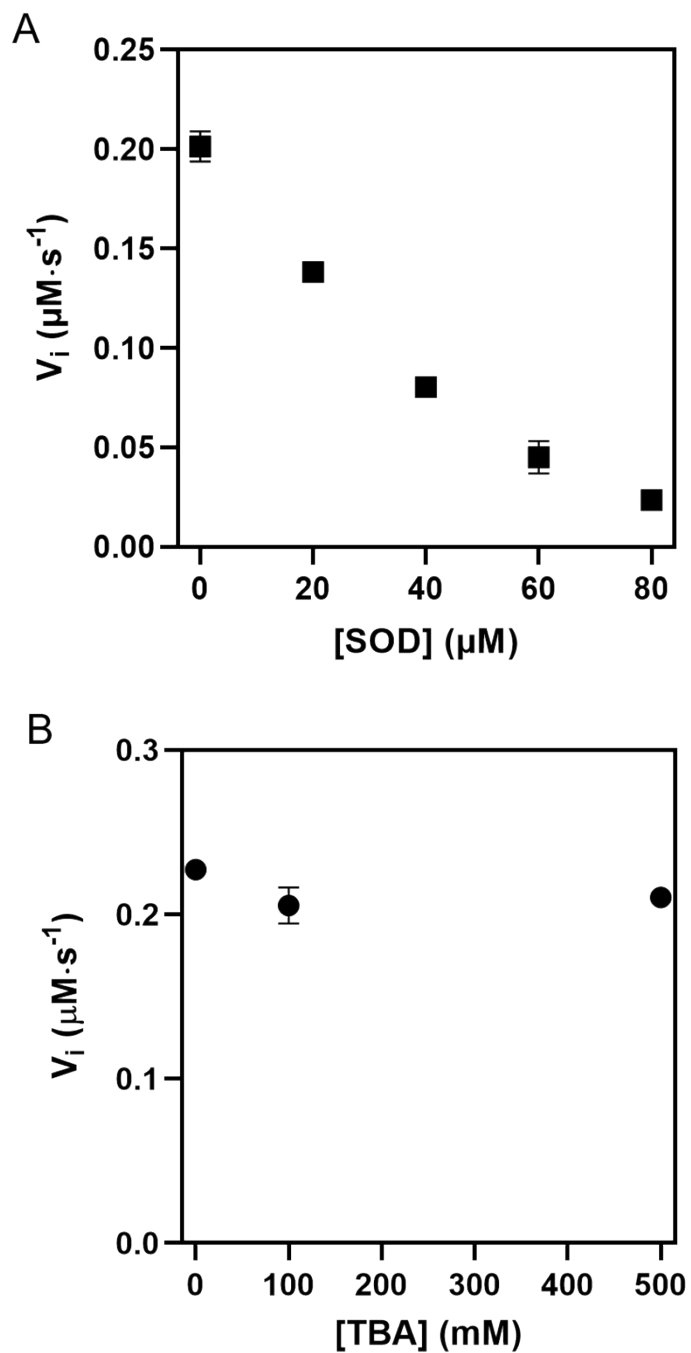

**Figure S10** Density functional theory model of the ternary complex intermediate of nucleotides/  $\text{Cu}^{2+}$ /tyramine/  $\text{H}_2\text{O}_2$ , and the Isosurface map of IRI analyse, revealing both chemical bonds and weak interactions. IRI=1.2.

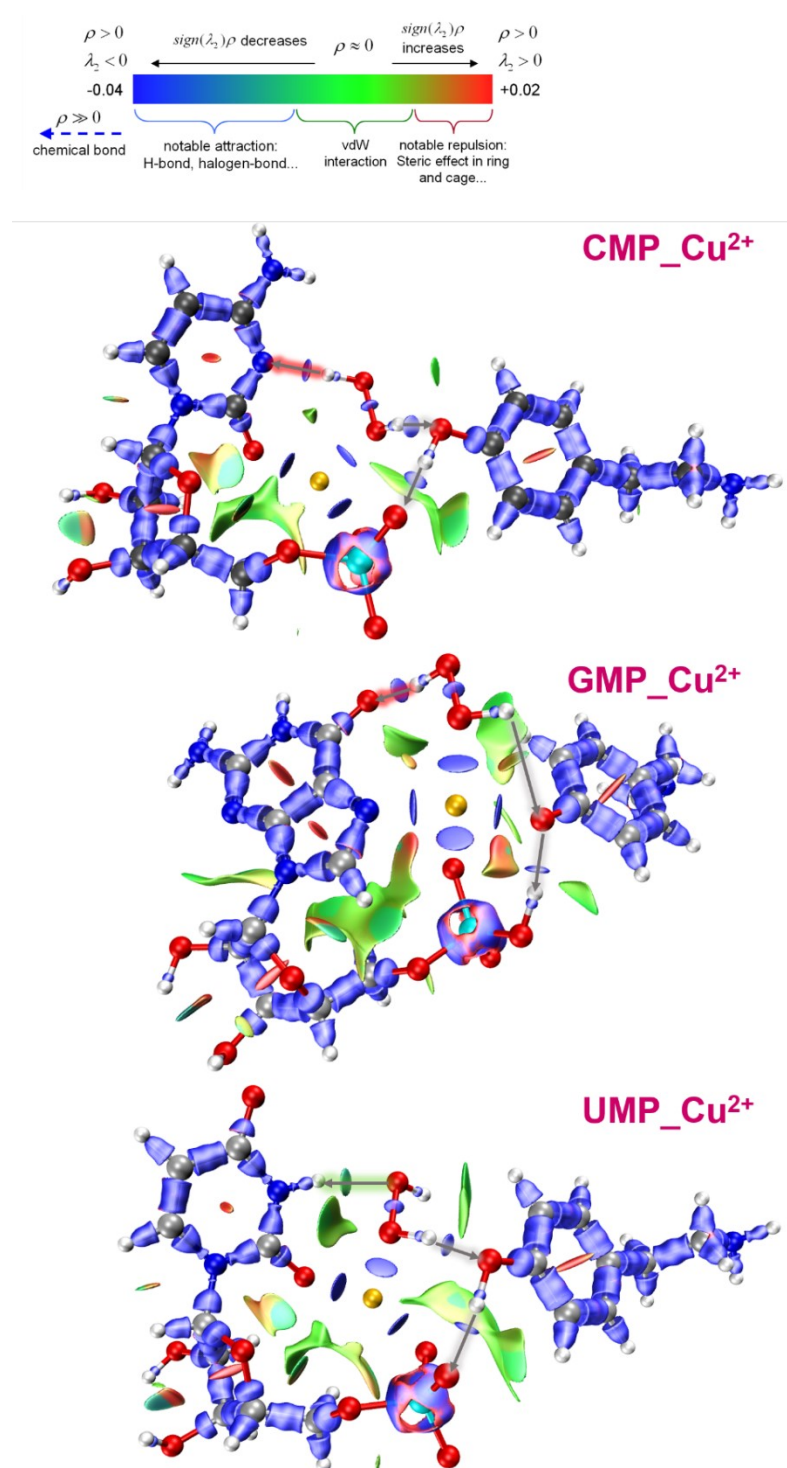

**Figure S11** Free energy during the formation of HO<sub>2</sub>• radical suggested by DFT calculations.

Free energies and enthalpies were calculated at 298 K. The inserted figures were structure optimization and spin density computation during the formation of HO<sub>2</sub>• radical suggested by DFT calculations.

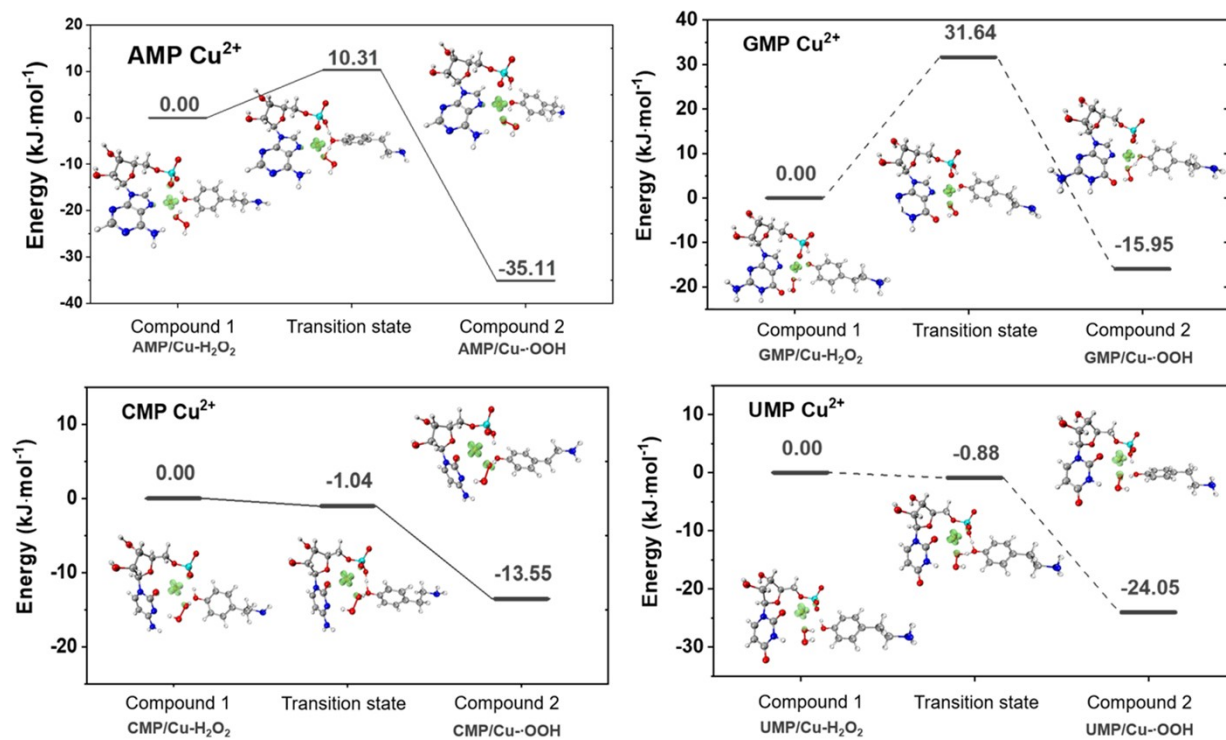

**Figure S12** Active energy measurements of A/C/G/UMP and copper's catalytic reaction.

[nucleotide] = 20 mM, [Cu<sup>2+</sup>] = 50μM, H<sub>2</sub>O<sub>2</sub> (1 mM), tyramine (1 mM).

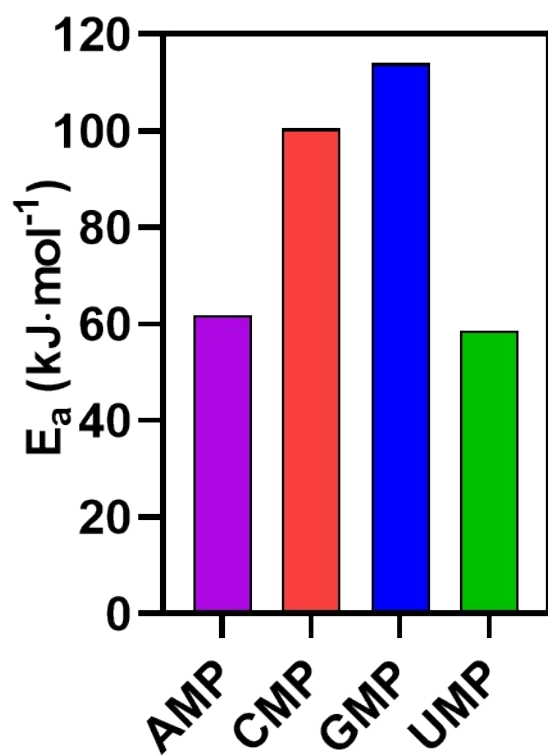



**Figure S13** Deaeration effect on tyramine's oxidation reaction catalysed by  $\text{Cu}^{2+}$  and AMP.

AMP (20 mM),  $\text{Cu}^{2+}$  (50  $\mu\text{M}$ ),  $\text{H}_2\text{O}_2$  (5 mM), tyramine (1 mM). Insert was the initial reaction rate. The data were presented as the mean  $\pm$  s.d., with the error bars representing the s.d. and  $N=3$ .

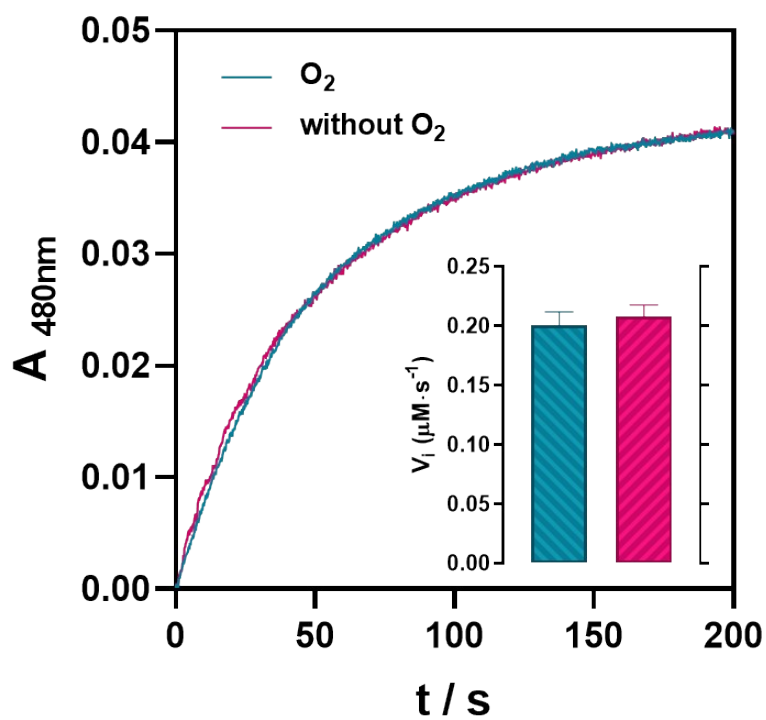

Figure S14 Proposal hydroxyl radical intermediate route.

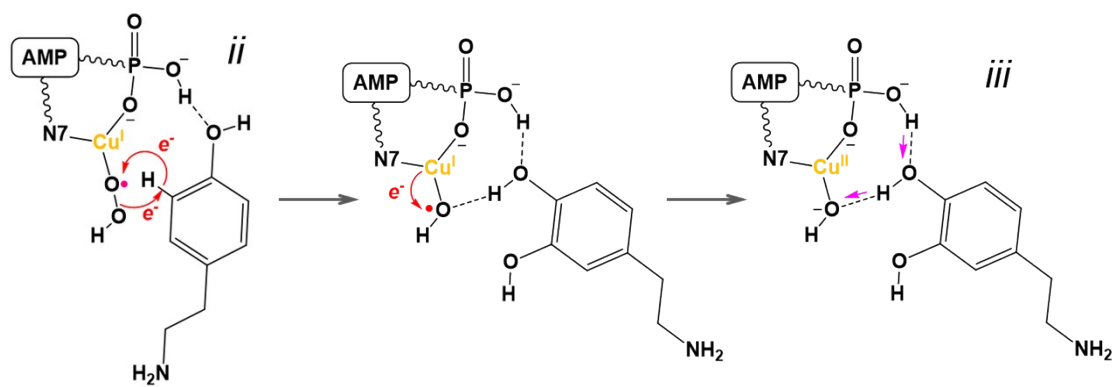

**Figure S15** Comparison of DNA's and nucleotide's catalytic reactivity with  $\text{Cu}^{2+}$ .  $\text{Cu}^{2+}$  (50 Mm),  $\text{H}_2\text{O}_2$  (5 mM), tyrosine (1 mM), nucleobase in nucleotides and ssDNA (20 mM). The data are presented as the mean  $\pm$  s.d., with the error bars representing the s.d. and  $N=3$ .

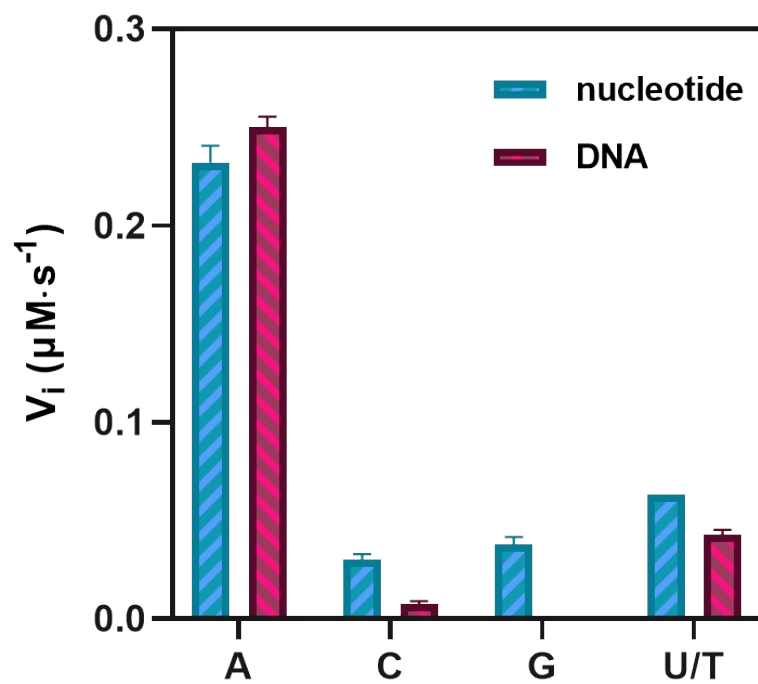

**Figure S16** AMP concentration effect on the catalytic oxidation of tyramine.  $\text{Cu}^{2+}$  (50  $\mu\text{M}$ ),  $\text{H}_2\text{O}_2$  (5 mM), tyramine (1 mM). The data are presented as the mean  $\pm$  s.d., with the error bars representing the s.d. and  $N=3$ .

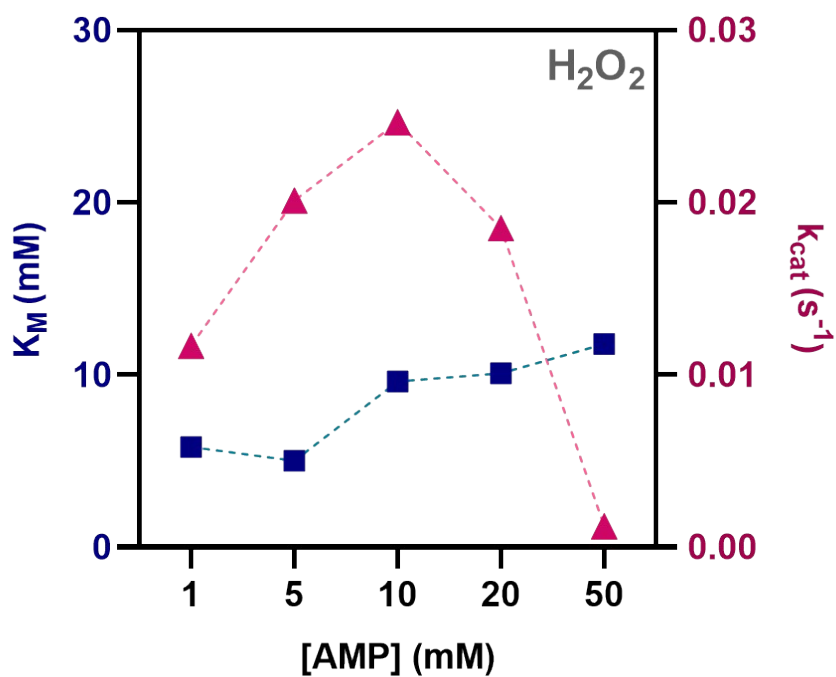

**Figure S17** Oxidation of o-tert-butylphenol (A), dopamine (B) and tyrosine (C) catalysed by AMP/Cu<sup>2+</sup>. AMP (2 mM), Cu<sup>2+</sup> (100 μM), H<sub>2</sub>O<sub>2</sub> (5 mM), tyrosine (1 mM), time interval (5 min).

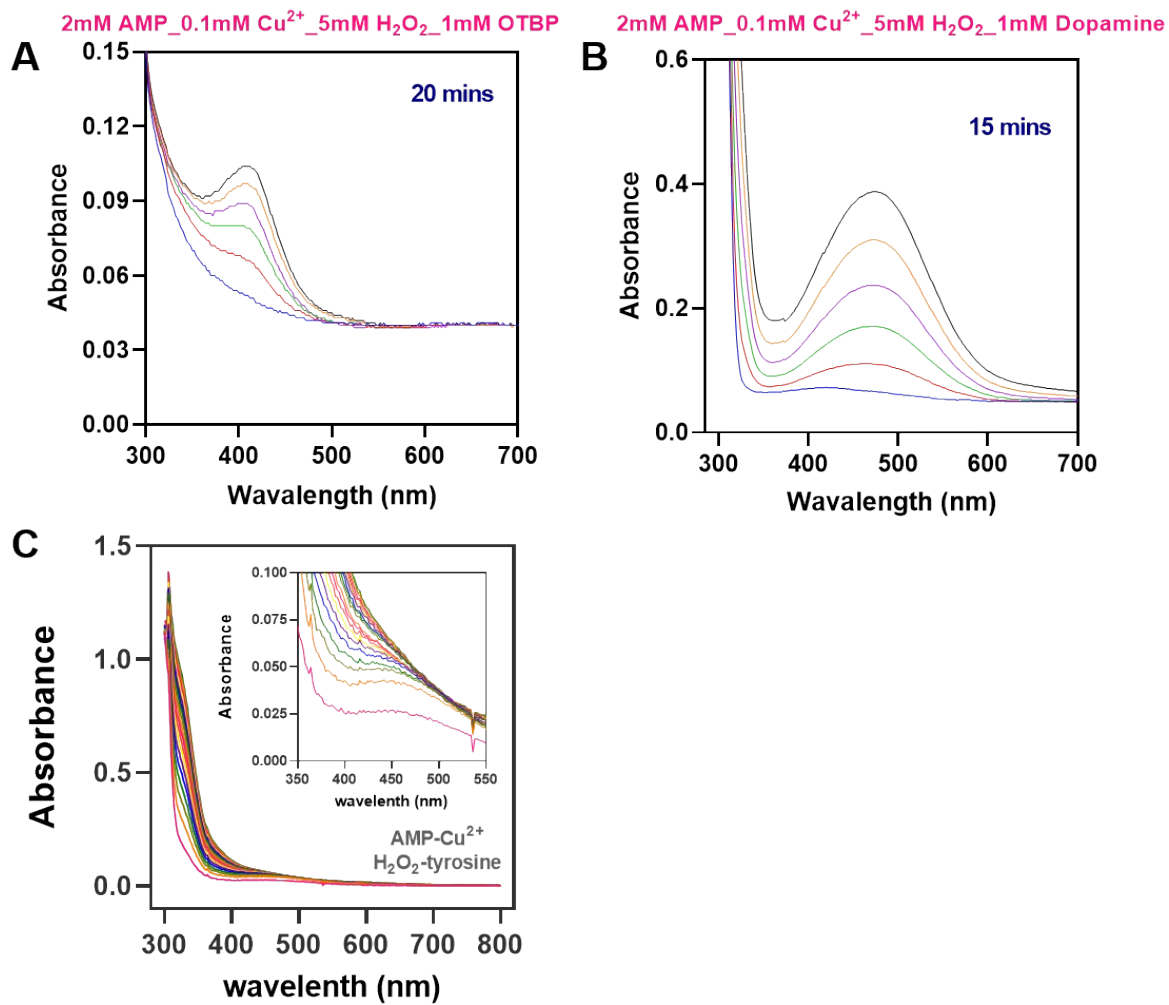

**Figure S18** Temperature effect on oxidation of tyramine catalysed by AMP/Cu<sup>2+</sup>, polyA<sub>20</sub>/Cu<sup>2+</sup> and tyrosinase. AMP (20 mM), A<sub>20</sub> (1 μM), Cu<sup>2+</sup> (50 μM), H<sub>2</sub>O<sub>2</sub> (1 mM), tyrosinase (10 μM), tyramine (1 mM). The data are presented as the mean ± s.d., with the error bars representing the s.d. and N = 3.

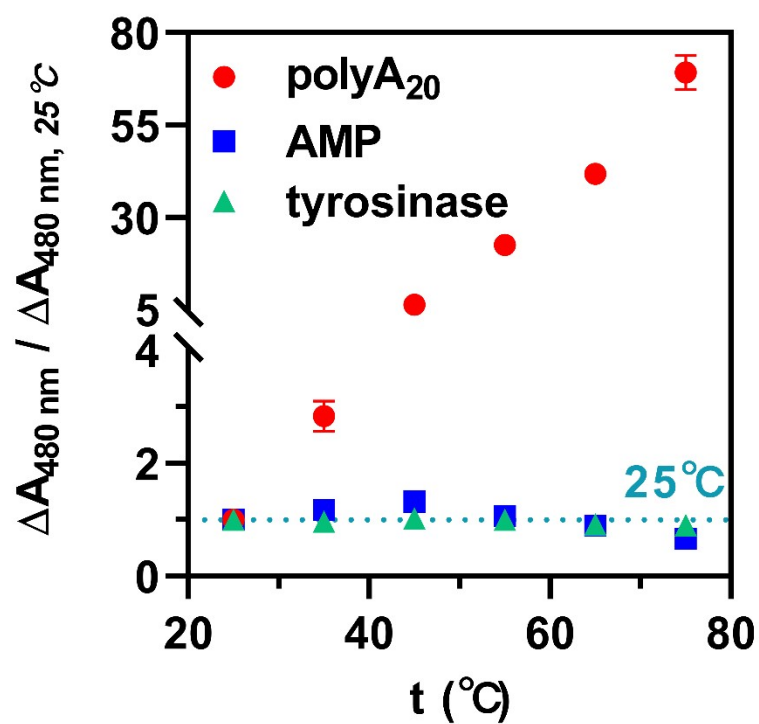

**Figure S19** Temperature effect on oxidation of tyramine catalysed by AMP/Cu<sup>2+</sup>, GMP/Cu<sup>2+</sup>, polyG20 (1  $\mu$ M), GMP (20 mM), Cu<sup>2+</sup> (50  $\mu$ M), H<sub>2</sub>O<sub>2</sub> (1 mM), tyramine (1 mM). The data are presented as the mean  $\pm$  s.d., with the error bars representing the s.d. and N = 3.

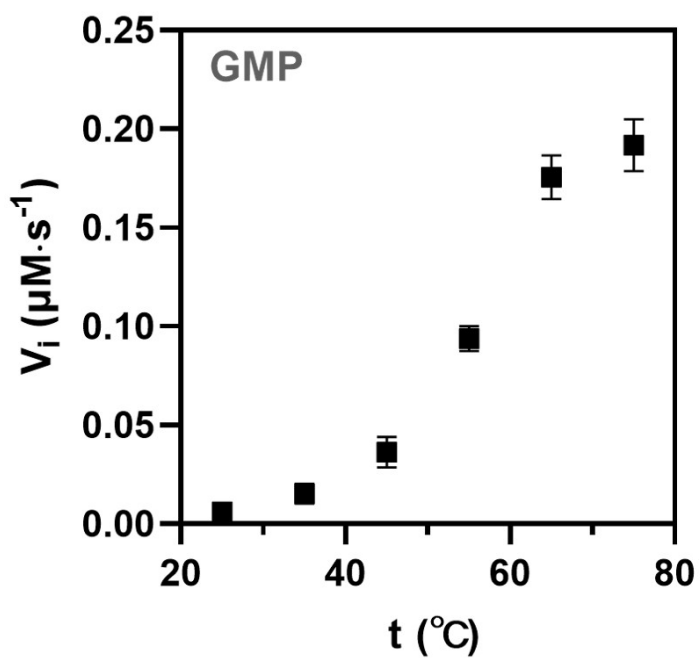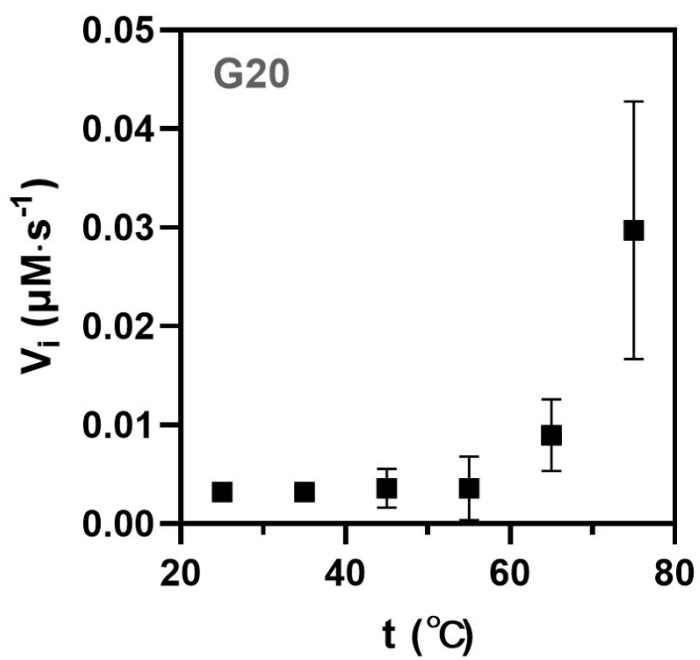

**Figure S20** Oxidation of tyramine catalysed by  $\text{Cu}^{2+}$  and  $\text{AMP}/\text{Cu}^{2+}$  at different temperatures.  $[\text{AMP}] = 20 \text{ mM}$ ,  $[\text{Cu}^{2+}] = 50 \text{ }\mu\text{M}$ ,  $[\text{tyramine}] = 1 \text{ mM}$ ,  $[\text{H}_2\text{O}_2] = 1 \text{ mM}$ .

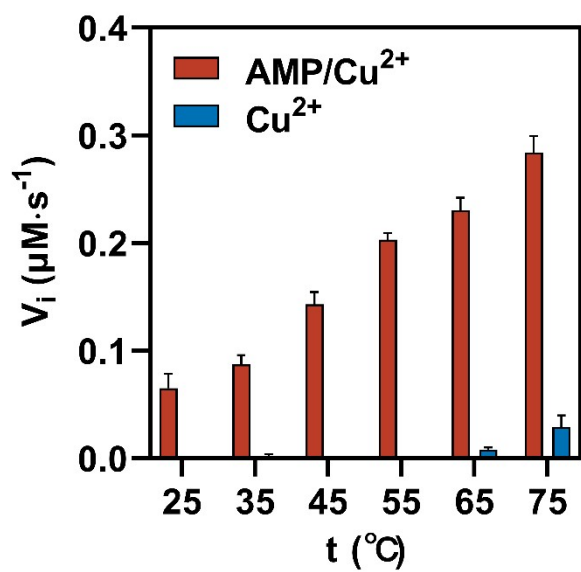

Supplement: d3tb00780d1.pdf [file d3tb00780d1.pdf]
